# Supplementary material for: Leaflet Stresses During Full Device Simulation of Crimping to 6 mm in Transcatheter Aortic Valve Implantation, TAVI
Source: PubMed Central journal article supplement (PMC9616759; doi:10.1007/s13239-022-00614-6), 2022-03-01
Supplement: 13239_2022_614_MOESM1_ESM.pdf [file 13239_2022_614_MOESM1_ESM.pdf]

Ongoing research using the same valve model is investigating crimping to 6 mm using axial displacement of a sheath as illustrated in Fig. A.

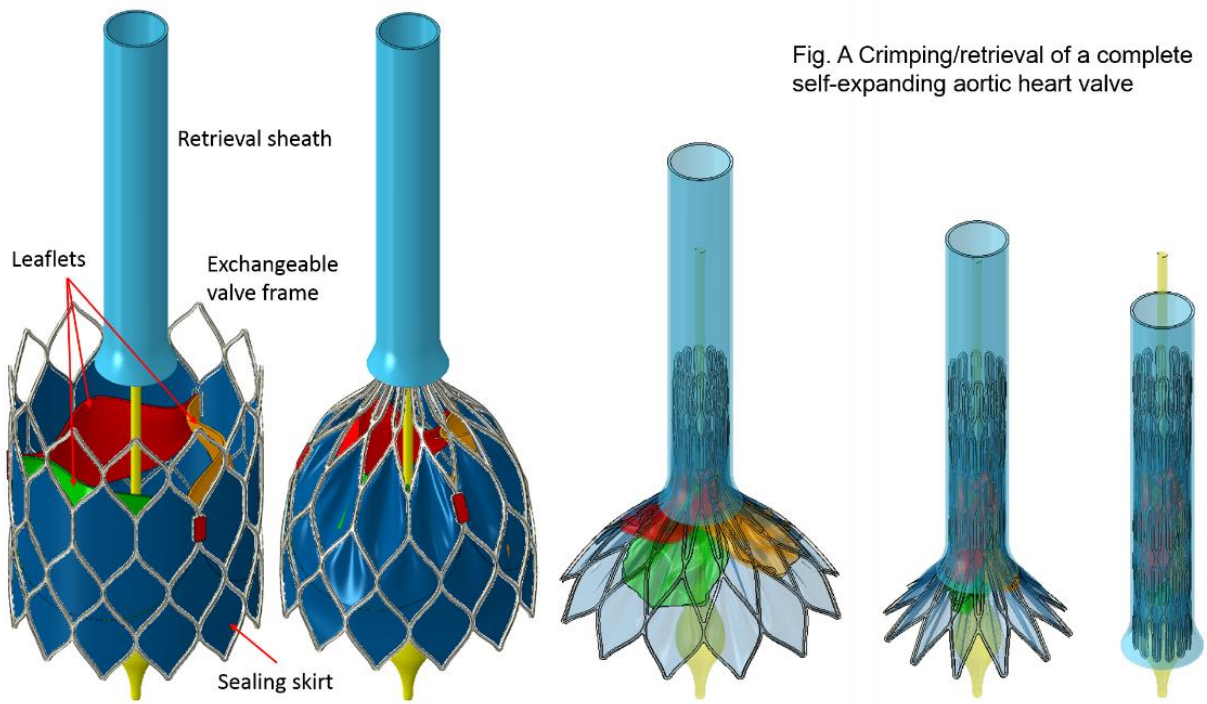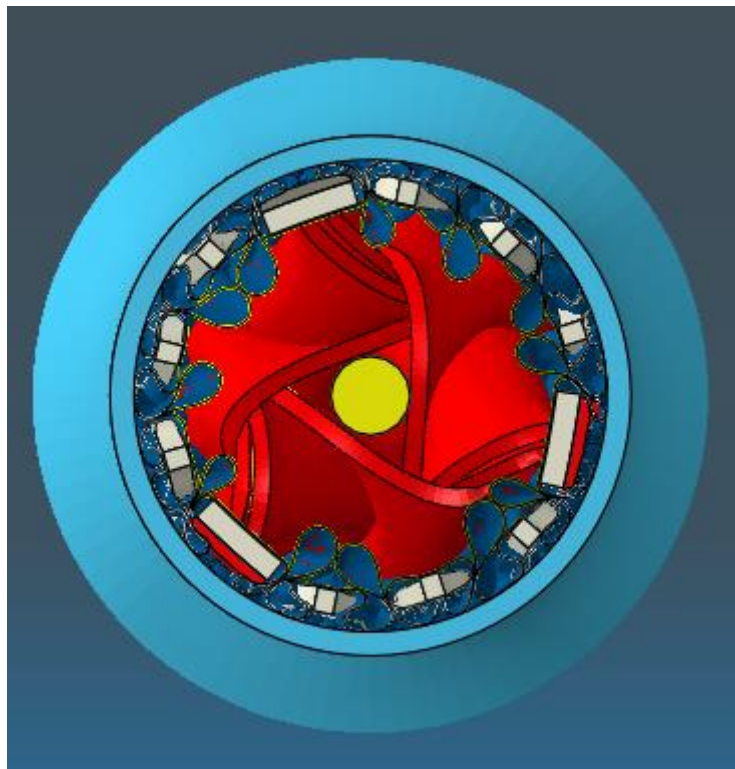

Fig. B View from above illustrating the folding pattern in the leaflets following axial crimping through a sheath.
